# Supplementary material for: Gas-Particle Partitioning and SOA Yields of Organonitrate Products from NO3-Initiated Oxidation of Isoprene under Varied Chemical Regimes
Source: PubMed Central journal article supplement — ACS Earth Space Chem. 2021 Mar 11;5(4):785–800. doi: 10.1021/acsearthspacechem.0c00311 (PMC8054245; doi:10.1021/acsearthspacechem.0c00311), 2021-03-11
Supplement: sp0c00311_si_001.pdf [file sp0c00311_si_001.pdf]

**Supplementary Information for “Gas-particle partitioning and SOA yields of organonitrate products from NO<sub>3</sub>-initiated oxidation of isoprene under varied chemical regimes,” Brownwood et al.**

**Table S1:** Experimental parameters. Specified here are the reaction conditions for each experiment, and the chemical regime favored. The chamber reactant concentrations are listed as well other descriptors of the experiment. The total amount of isoprene consumed was modeled and predicted by Philip Carlsson (Forschungszentrum Jülich, IEK-8). The final alkyl nitrate concentration was measured by the TD-CRDS. Reactants were periodically reinjected throughout the experiment for a batch mode experiment. These injections tried to maintain a general concentration of NO<sub>2</sub> or O<sub>3</sub> in the chamber at all times and so the approximate maximum concentration of each injection is listed here. The total amount of isoprene injected by summing all additions is listed, alongside the calculated amount of isoprene consumed by NO<sub>3</sub>, the latter of which is used to determine yields in this paper. Gas-phase experiments have white background; seeded have grey background.

| Date | Favored Regime                    | Reactant Conc's in chamber (ppbv)                             | Expt Length (hours)  | Chamber Conditions/ Description                   | RH (%) | Isoprene Consumed by NO <sub>3</sub> (ppbv) | Final Alkyl Nitrate Build Up (ppbv)                         | Maximum Wall Loss Correction % |
|------|-----------------------------------|---------------------------------------------------------------|----------------------|---------------------------------------------------|--------|---------------------------------------------|-------------------------------------------------------------|--------------------------------|
| 3    |                                   | O <sub>3</sub> : 100<br>NO <sub>2</sub> : 5<br>Isoprene: 11.1 | 6                    | humid                                             | 40     | 2.3                                         | 2.13                                                        | 7                              |
| 6    | RO <sub>2</sub> enhanced          | O <sub>3</sub> : 100<br>NO <sub>2</sub> : 5<br>Isoprene: 6    | 4 (before roof open) | Night-to-day, humid                               | 30     | 4.0                                         | Before roof open: 2.8 ± 0.1<br>After roof open: 1.39 ± 0.02 | 17                             |
| 7    | RO <sub>2</sub> isom              | O <sub>3</sub> : 50<br>NO <sub>2</sub> : 5<br>Isoprene: 6     | 7                    | Slow RO <sub>2</sub> , low humidity, HCl contam   | 10     | 4.2                                         | 1.9 ± 0.15                                                  | 3                              |
| 8    | RO <sub>2</sub> enhanced          | O <sub>3</sub> : 100<br>NO <sub>2</sub> : 25<br>Isoprene: 30  | 5                    | High NO <sub>3</sub> , dry, HCl contam            | 0      | 14.4                                        | 11.1 ± 0.3                                                  | 21                             |
| 9    | RO <sub>2</sub> + HO <sub>2</sub> | O <sub>3</sub> : 100<br>NO <sub>2</sub> : 5<br>Isoprene: 7.5  | 5.5                  | 120 ppm of CO, 100 ppb of propene, dry            | 0      | 3.2                                         | 3.3 ± 0.2                                                   | 20                             |
| 10   | RO <sub>2</sub> isom              | O <sub>3</sub> : 50<br>NO <sub>2</sub> : 5<br>Isoprene: 3.5   | 6.5                  | dry                                               | 0      | 2.5                                         | 1.75 ± 0.08                                                 | 26                             |
| 12   | RO <sub>2</sub> enhanced          | O <sub>3</sub> : 100<br>NO <sub>2</sub> : 5<br>Isoprene: 9.5  | 4.5                  | Night-to-day, 120ppm CO added when roof open, dry | 0      | 4.8                                         | Before roof open: 3.9 ± 0.2<br>After roof open: 2.5 ± 0.2   | 21                             |

|    |                          |                                                              |     |     |   |      |             |    |
|----|--------------------------|--------------------------------------------------------------|-----|-----|---|------|-------------|----|
| 13 | RO <sub>2</sub> enhanced | O <sub>3</sub> : 100<br>NO <sub>2</sub> : 25<br>Isoprene: 27 | 5.5 | dry | 0 | 11.6 | 10.5 ± 0.14 | 24 |
|----|--------------------------|--------------------------------------------------------------|-----|-----|---|------|-------------|----|

| Date        | Favored Regime           | Reactant Conc's in chamber* (ppbv)                           | Experiment Length (hours) | Chamber Conditions/Description                                          | RH (%)  | Isoprene Consumed by NO <sub>3</sub> (ppbv) | Final Alkyl Nitrate Build Up (ppbv) | Maximum Wall Loss Correction % |
|-------------|--------------------------|--------------------------------------------------------------|---------------------------|-------------------------------------------------------------------------|---------|---------------------------------------------|-------------------------------------|--------------------------------|
| 14 Aug 2018 | RO <sub>2</sub> enhanced | O <sub>3</sub> : 100<br>NO <sub>2</sub> : 25<br>Isoprene: 20 | 4                         | High NO <sub>3</sub> , dry, AS seed                                     | 0       | 10.3                                        | 9.23 ± 0.09                         | 19                             |
| 15          | RO <sub>2</sub> enhanced | O <sub>3</sub> : 100<br>NO <sub>2</sub> : 25<br>Isoprene: 18 | 5                         | High NO <sub>3</sub> humid, AS seed                                     | 0 to 30 | 10.2                                        | 8.39 ± 0.09                         | 25                             |
| 16          | isom enhanced            | O <sub>3</sub> : 100<br>NO <sub>2</sub> : 5<br>Isoprene: 5   | 5                         | Photolysis (Night-to-day) humid, AS seed                                | 30      | 4.2                                         | 2.7 ± 0.2                           | 16                             |
| 18          | isom enhanced            | O <sub>3</sub> : 100<br>NO <sub>2</sub> : 5<br>Isoprene: 7   | 4                         | AS seed with organic coating (β-caryophyllene + O <sub>3</sub> ), humid | 60      | 4.0                                         | 2.1 ± 0.1                           | 13                             |

|    |                                             |                                                              |     |                                                                         |    |     |             |    |
|----|---------------------------------------------|--------------------------------------------------------------|-----|-------------------------------------------------------------------------|----|-----|-------------|----|
| 19 | RO <sub>2</sub> enhanced, no O <sub>3</sub> | O <sub>3</sub> : --<br>NO <sub>2</sub> : --<br>Isoprene: 9.5 | 4   | N <sub>2</sub> O <sub>5</sub> source, later MVK addition, dry           | 0  | 3.0 | 6.04 ± 0.06 | ~0 |
| 20 | RO <sub>2</sub> enhanced                    | O <sub>3</sub> :120<br>NO <sub>2</sub> : 5<br>Isoprene: 9    | 5.5 | AS seed with organic coating (β-caryophyllene + O <sub>3</sub> ), humid | 60 | 5.5 | 3.55 ± 0.08 | 24 |
| 21 | RO <sub>2</sub> + HO <sub>2</sub>           | O <sub>3</sub> : 100<br>NO <sub>2</sub> : 5<br>Isoprene: 9   | 6   | Plant emissions (propene addition), humid                               | 60 | 3.6 | 4.3 ± 0.2   | 22 |

**Table S2:** Key instruments used for the alkyl nitrate and aerosol analysis herein.

| <b>Instrument</b>                                                       | <b>Relevant species measured for this study</b>                         | <b>Inlet description</b>                                            | <b>Time resolution</b> | <b>Section where described</b> |
|-------------------------------------------------------------------------|-------------------------------------------------------------------------|---------------------------------------------------------------------|------------------------|--------------------------------|
| TD-CRDS (custom thermal dissociation + NO <sub>2</sub> cavity ringdown) | gas-phase total alkyl nitrates ( $\Sigma$ ANs)                          | 5 meter long ¼" Teflon inlet line                                   | 8 minutes              | 3.2                            |
| 3 independent NO <sub>2</sub> monitors                                  | NO <sub>2</sub>                                                         | 4-6 meter long ¼" Teflon inlet line                                 | 1 minute               | 3.2                            |
| HR-ToF-AMS, Aerodyne Research Inc., USA                                 | Aerosol-phase OA, total NO <sub>3</sub> , and OrgNO <sub>3</sub>        | 4 meter long ¼" stainless steel inlet line                          | 4 minutes              | 3.4                            |
| VOCUS                                                                   | isoprene                                                                | 2 meter long ¼" Teflon inlet line                                   | 1 minute               | 3.3                            |
| SMPS                                                                    | total particle volume concentration (size range between 10nm to 450 nm) | 4-6 meter long ¼" stainless steel inlet line                        | 7 minutes              | 3.5                            |
| FIGAERO HR-ToF-CIMS (I-ionization), Aerodyne Research Inc.              | Gas and particle-phase speciated alkyl nitrates and organics            | Gas inlet 4m long ¼" PFA. Particle inlet 4m long ½" stainless steel | 1 second               | 4.1                            |
| HR-ToF-CIMS (Br <sup>-</sup> ionization), Aerodyne Research Inc.        | gas-phase organonitrates                                                | no external inlet                                                   | 2 seconds              | 4.1                            |

**Table S3:** Breakdown of the reactive fate of the initially formed nitrate peroxy radicals by day for four exemplary days, nomenclature and mechanism following Vereecken *et al.*, 2021 (ref. 46). Relative weight of 1-nitrate to 4-nitrate addition sites are modeled as 87/13. The equilibrium ratio of the site specific peroxy radicals was calculated to be 8% Z-ISOP1N400, 18% E-ISOP1N400, 74% ISOP1N200 and 20% Z-ISOP1004N, 40% E-ISOP1004N, 40% ISOP3004N, respectively. Only the Z-conformers have contributing unimolecular decomposition pathways.

| 09 August "HO <sub>2</sub> "        | unimolecular loss /% | reaction with HO <sub>2</sub> /% | reaction with NO <sub>3</sub> /% | reaction with RO <sub>2</sub> /% |
|-------------------------------------|----------------------|----------------------------------|----------------------------------|----------------------------------|
| Z-ISOP1N400                         | 37                   | 54                               | 1                                | 8                                |
| E-ISOP1N400                         | -                    | 86                               | 2                                | 12                               |
| ISOP1N200                           | -                    | 98                               | 2                                | 0                                |
| <b>all 1-nitrate RO<sub>2</sub></b> | <b>3</b>             | <b>92</b>                        | <b>2</b>                         | <b>3</b>                         |
| Z-ISOP1004N                         | 63                   | 32                               | 1                                | 5                                |
| E-ISOP1004N                         | -                    | 86                               | 2                                | 12                               |
| ISOP3004N                           | -                    | 94                               | 2                                | 4                                |
| <b>all 4-nitrate RO<sub>2</sub></b> | <b>13</b>            | <b>78</b>                        | <b>1</b>                         | <b>8</b>                         |
| <b>all nitrate RO<sub>2</sub></b>   | <b>4</b>             | <b>91</b>                        | <b>2</b>                         | <b>4</b>                         |

| 10 August "isom enhanced"           | unimolecular loss /% | reaction with HO <sub>2</sub> /% | reaction with NO <sub>3</sub> /% | reaction with RO <sub>2</sub> /% |
|-------------------------------------|----------------------|----------------------------------|----------------------------------|----------------------------------|
| Z-ISOP1N400                         | 78                   | 9                                | 5                                | 8                                |
| E-ISOP1N400                         | -                    | 40                               | 22                               | 38                               |
| ISOP1N200                           | -                    | 64                               | 36                               | 0                                |
| <b>all 1-nitrate RO<sub>2</sub></b> | <b>6</b>             | <b>55</b>                        | <b>31</b>                        | <b>8</b>                         |
| Z-ISOP1004N                         | 91                   | 4                                | 2                                | 3                                |
| E-ISOP1004N                         | -                    | 41                               | 26                               | 33                               |
| ISOP3004N                           | -                    | 54                               | 34                               | 13                               |
| <b>all 4-nitrate RO<sub>2</sub></b> | <b>18</b>            | <b>39</b>                        | <b>24</b>                        | <b>19</b>                        |

|                        |          |           |           |          |
|------------------------|----------|-----------|-----------|----------|
| <b>all nitrate RO2</b> | <b>8</b> | <b>53</b> | <b>30</b> | <b>9</b> |
|------------------------|----------|-----------|-----------|----------|

| <b>12 August "RO<sub>2</sub> enhanced" (slower RO<sub>2</sub> production)</b> | <b>unimolecular loss /%</b> | <b>reaction with HO<sub>2</sub> /%</b> | <b>reaction with NO<sub>3</sub> /%</b> | <b>reaction with RO<sub>2</sub> /%</b> |
|-------------------------------------------------------------------------------|-----------------------------|----------------------------------------|----------------------------------------|----------------------------------------|
| Z-ISOP1N400                                                                   | 65                          | 14                                     | 9                                      | 13                                     |
| E-ISOP1N400                                                                   | -                           | 38                                     | 24                                     | 38                                     |
| ISOP1N200                                                                     | -                           | 61                                     | 38                                     | 0                                      |
| <b>all 1-nitrate RO2</b>                                                      | <b>5</b>                    | <b>53</b>                              | <b>33</b>                              | <b>8</b>                               |
| Z-ISOP1004N                                                                   | 85                          | 6                                      | 4                                      | 5                                      |
| E-ISOP1004N                                                                   | -                           | 40                                     | 26                                     | 34                                     |
| ISOP3004N                                                                     | -                           | 52                                     | 35                                     | 13                                     |
| <b>all 4-nitrate RO2</b>                                                      | <b>17</b>                   | <b>38</b>                              | <b>25</b>                              | <b>20</b>                              |
| <b>all nitrate RO2</b>                                                        | <b>7</b>                    | <b>51</b>                              | <b>32</b>                              | <b>10</b>                              |

| <b>13 August "RO<sub>2</sub> enhanced" (faster RO<sub>2</sub> production)</b> | <b>unimolecular loss /%</b> | <b>reaction with HO<sub>2</sub> /%</b> | <b>reaction with NO<sub>3</sub> /%</b> | <b>reaction with RO<sub>2</sub> /%</b> |
|-------------------------------------------------------------------------------|-----------------------------|----------------------------------------|----------------------------------------|----------------------------------------|
| Z-ISOP1N400                                                                   | 45                          | 20                                     | 11                                     | 24                                     |
| E-ISOP1N400                                                                   | -                           | 34                                     | 19                                     | 47                                     |
| ISOP1N200                                                                     | -                           | 64                                     | 36                                     | 1                                      |
| <b>all 1-nitrate RO2</b>                                                      | <b>4</b>                    | <b>55</b>                              | <b>31</b>                              | <b>11</b>                              |
| Z-ISOP1004N                                                                   | 74                          | 11                                     | 7                                      | 8                                      |
| E-ISOP1004N                                                                   | -                           | 38                                     | 22                                     | 40                                     |
| ISOP3004N                                                                     | -                           | 53                                     | 31                                     | 17                                     |
| <b>all 4-nitrate RO2</b>                                                      | <b>15</b>                   | <b>38</b>                              | <b>22</b>                              | <b>25</b>                              |

|                        |          |           |           |           |
|------------------------|----------|-----------|-----------|-----------|
| <b>all nitrate RO2</b> | <b>5</b> | <b>53</b> | <b>30</b> | <b>13</b> |
|------------------------|----------|-----------|-----------|-----------|



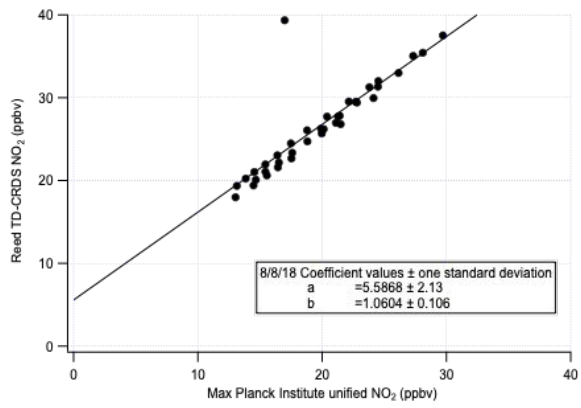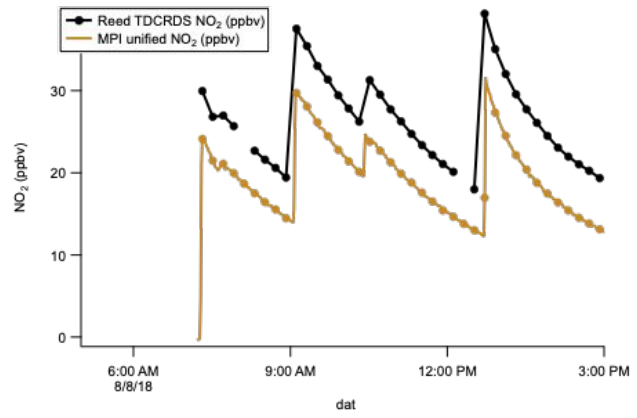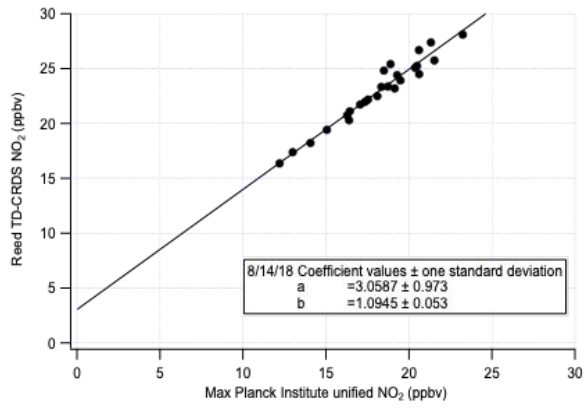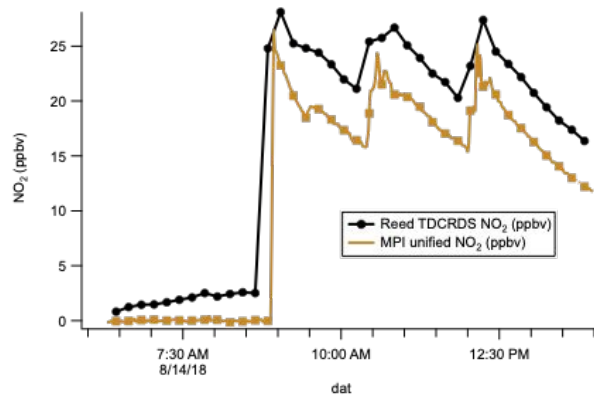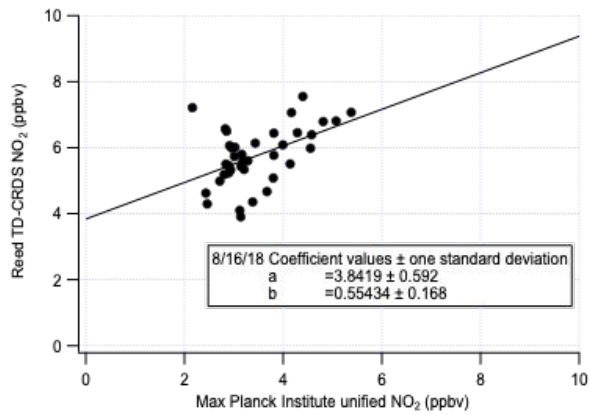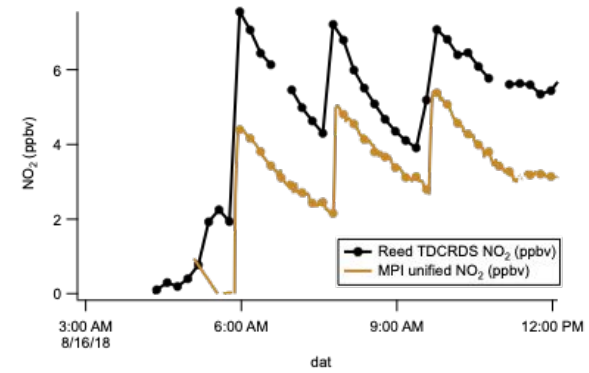

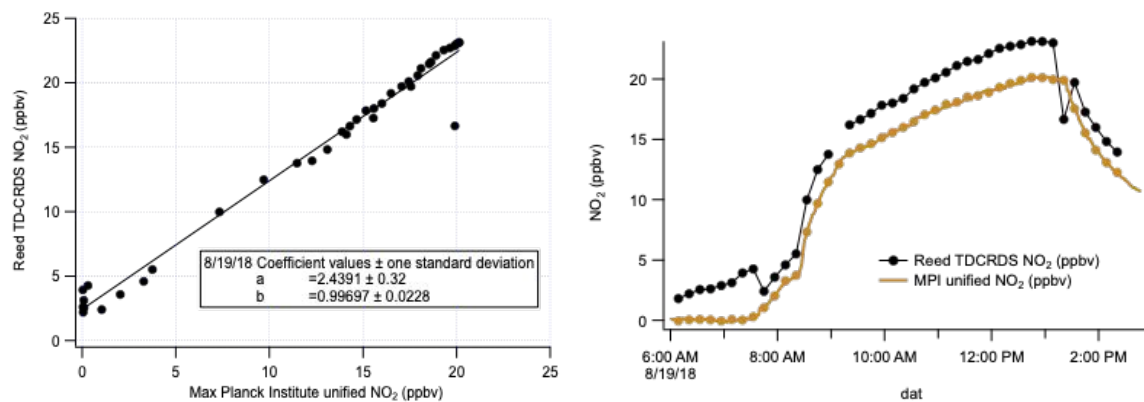

**Figure S1.** Scatterplot NO<sub>2</sub> comparisons from Figure 2 alongside corresponding timeseries comparisons.

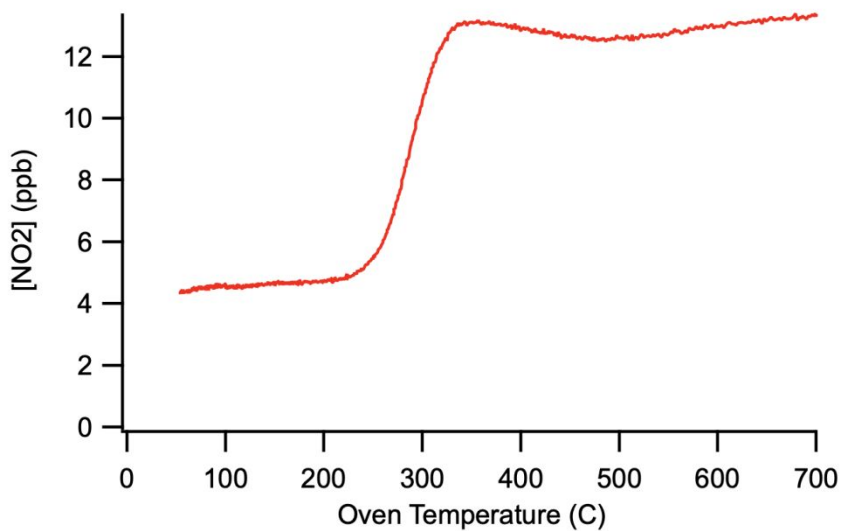

**Figure S2.** Thermogram (oven temperature ramp) on a chamber mix of isoprene + NO<sub>3</sub> products. This supports the selection of 385 as the over temperature to measure alkyl nitrates. Collected on the SAPHIR chamber on 17. August 2018.

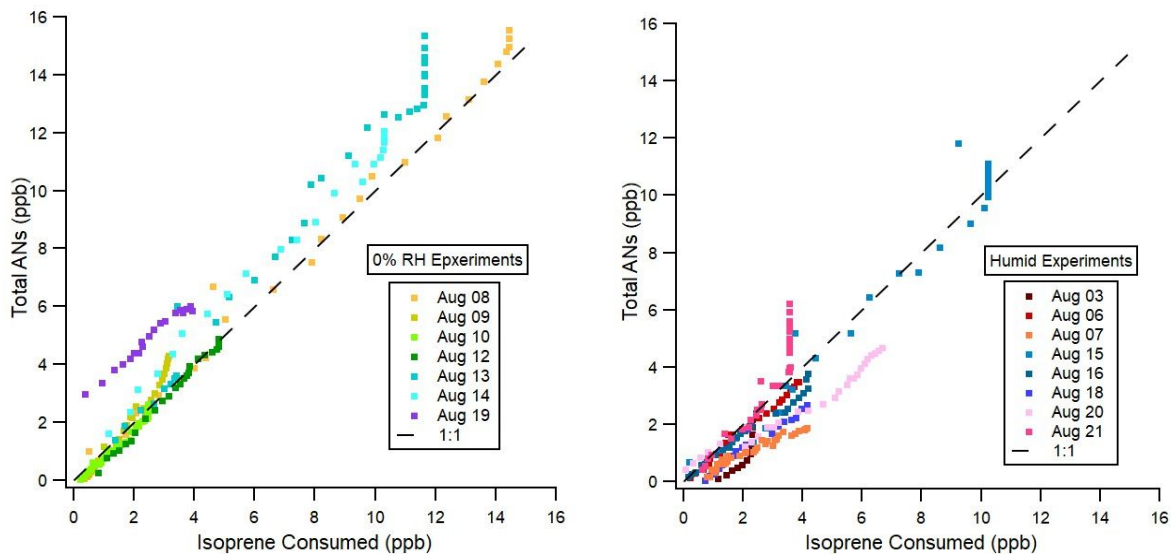

**Figure S3.** Total alkyl nitrate yield plots split out by humidity.

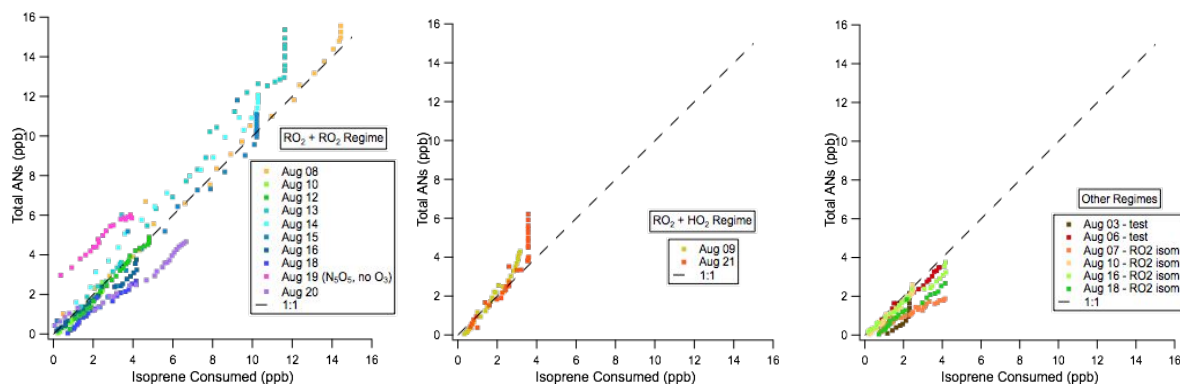

**Figure S4.** Total alkyl nitrate yield plots split out by  $\text{RO}_2$  fate / reaction regime. The most common  $\text{RO}_2 + \text{RO}_2$  enhanced regime has significant scatter, but  $\text{RO}_2 + \text{HO}_2$  enhanced hints at higher yield and  $\text{RO}_2$  isomerization at lower yields.

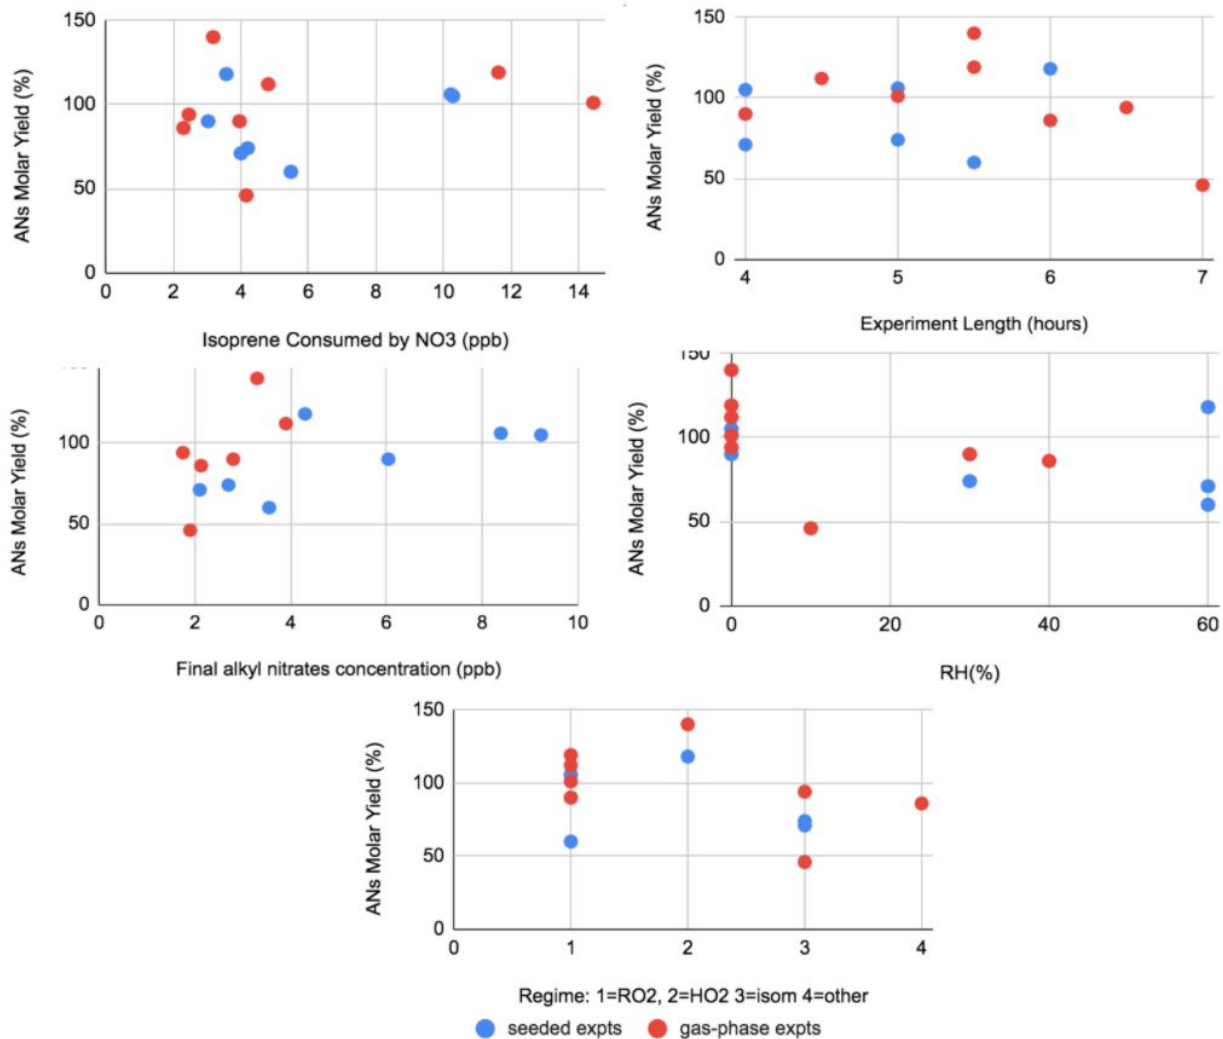

**Figure S5.** ANs yields plotted against several experimental variables in search of any dependencies. There are no clear dependences on isoprene consumed, alkyl nitrate formed, experiment length, %RH, or whether seeded. There is significant scatter within each chemical regime, but HO<sub>2</sub> regime experiments appear to have higher yields and isomerization experiments slightly lower yields.

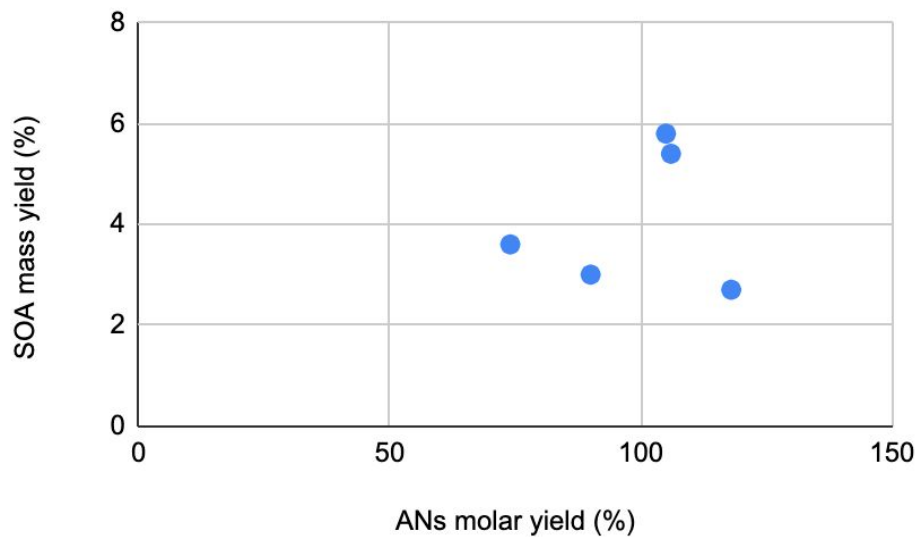

**Figure S6.** SOA mass yield measurements (using values from OrgNO3 with  $R = 0.19$ ) scattered against alkyl nitrate yield, for all experiments for which both measures are available. No clear trend is observed.
